# Supplementary material
Source: PubMed Central journal article supplement (PMC4834212)
Supplement: NIHMS774767-supplement-01.pdf [file NIHMS774767-supplement-01.pdf]

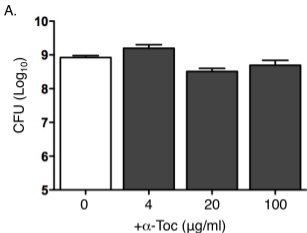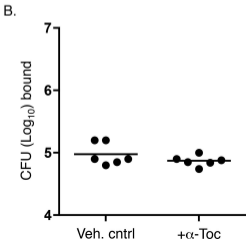

1 **Legends:**

- 2 Supplemental figure 1.  $\alpha$ -Toc does not affect bacterial viability or binding to H292 cells. *S.*  
3 *pneumoniae* was grown for 2.5 hours at 37°C/5% CO<sub>2</sub> in THY media supplemented with the  
4 indicated concentration of  $\alpha$ -Toc or vehicle control (A). The culture was then plated on blood  
5 agar plate for enumeration of live bacteria. (B) H292 cells were treated with 100  $\mu$ g/ml (+ $\alpha$ -Toc)  
6 VE or vehicle control (Veh. cntrl) overnight and then infected with *S. pneumoniae* for 2.5 hours.  
7 The amount of bound bacteria was then compared between the different groups.
